# Supplementary material for: Steroid receptor coactivator 3 regulates autophagy in breast cancer cells through macrophage migration inhibitory factor
Source: Springer Nature journal article supplement (doi:10.1038/cr.2012.44), 2012-03-20
Supplement: 41422_2012_BFcr201244_MOESM69_ESM.pdf [file 41422_2012_BFcr201244_MOESM69_ESM.pdf]

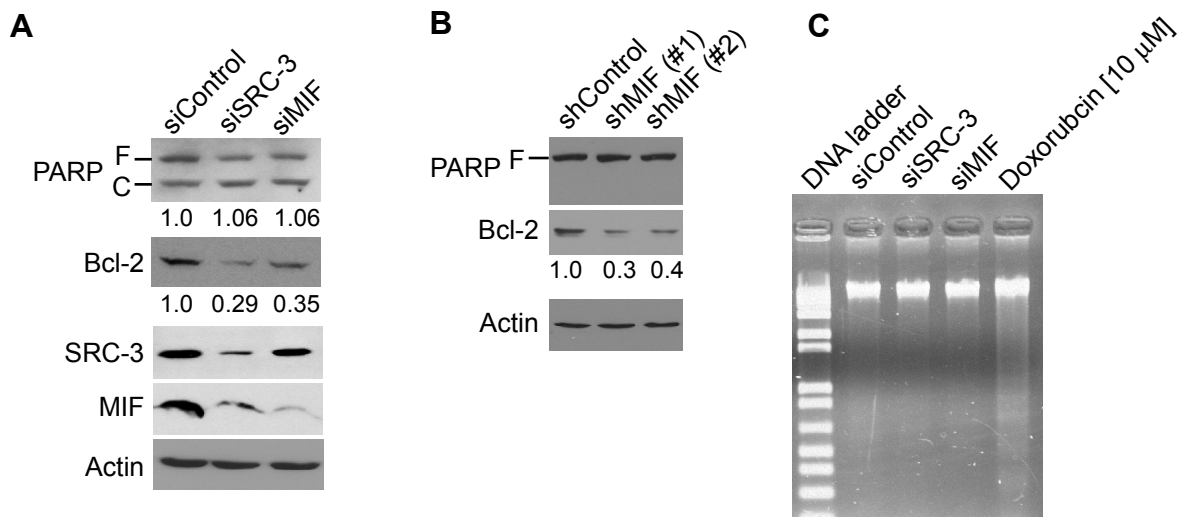

**Supplemental figure 8. Knockdown of SRC-3 or MIF did not increase PARP cleavage or DNA fragmentation.** (A) The expressions of Bcl-2 and cleavage of PARP in MCF-7 cells transfected with control siRNA or siRNAs specific for SRC-3 or MIF were determined by immunoblot analysis. Knockdown of SRC-3 or MIF was confirmed in separate immunoblot analysis using the same cell lysates. The levels of actin were used as loading controls. F: full-length PARP; C: cleaved PARP. (B) The expressions of Bcl-2 and cleavage of PARP from stable MIF knockdown MCF-7 cells were determined by immunoblot analysis. The levels of actin were used as loading controls. F: full-length PARP. (C) Cells transfected with control siRNA or siRNAs specific for SRC-3 or MIF were used for DNA fragmentation assays. Sample from cells treated with doxorubicin (10 μM) was used as a positive control for the DNA fragmentation assays.

### Supplemental figure 8
